# Supplementary material for: Enhancement of the thermoelectric performance of Cu3SbSe4 particles by controlling morphology using exfoliated selenium nanosheets
Source: Royal Society of Chemistry journal article supplement (doi:10.1039/d2dt01181f), 2022-01-01
Supplement: d2dt01181f1.pdf [file d2dt01181f1.pdf]

## Supporting Information

### **Enhancement of the thermoelectric performance of $\text{Cu}_3\text{SbSe}_4$ particles by controlling morphology using exfoliated selenium nanosheets**

Minsu Kim<sup>1</sup>, Dabin Park<sup>1</sup>, and Jooheon Kim<sup>1,2,3\*</sup>

1. School of Chemical Engineering & Materials Science, Chung-Ang University, Seoul 06974, Republic of Korea
2. Department of Advanced Materials Engineering, Chung-Ang University, Anseong-si, Gyeonggi-do 17546, Republic of Korea
3. Department of Intelligent Energy and Industry, Graduate School, Chung-Ang University, Seoul 06974, Republic of Korea

\*Corresponding author: Jooheon Kim, E-mail address: [jooheonkim@cau.ac.kr](mailto:jooheonkim@cau.ac.kr)

**Supporting Information:**

## Figures

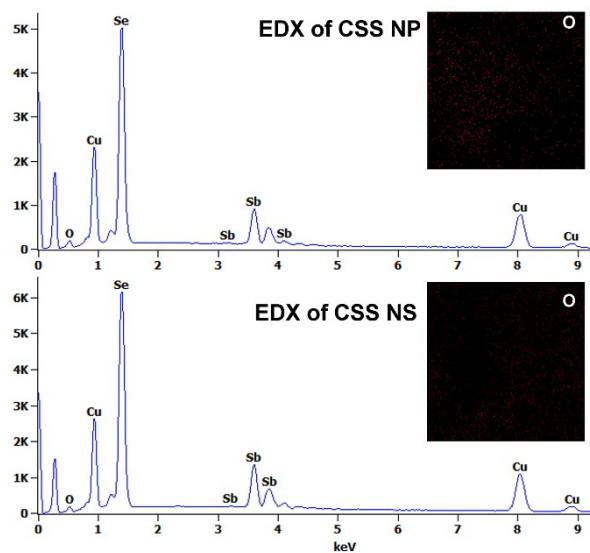

Fig. S1. EDX spectra and EDS elemental mapping of O of CSS NP and CSS NS.

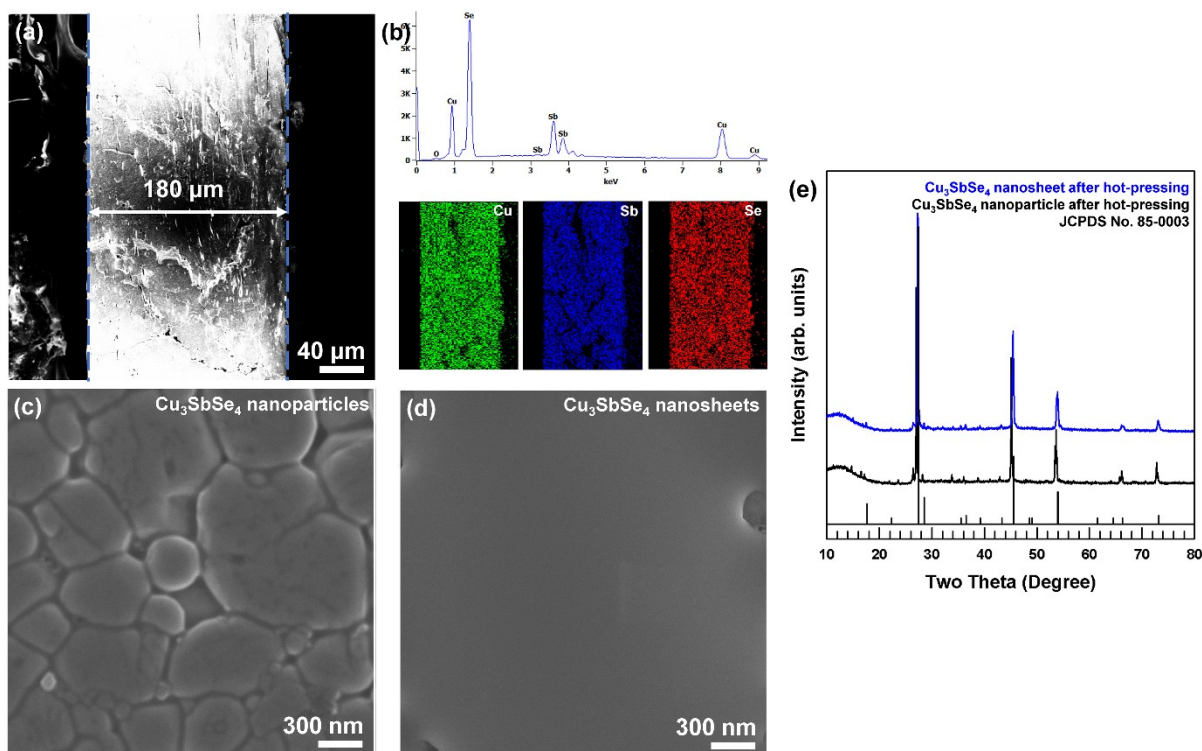

Fig. S2. (a) Cross-sectional FE-SEM image (b) EDX spectra and EDS elemental mapping of Cu (green), Sb (blue) and Se (red) of  $\text{Cu}_3\text{SbSe}_4$  disk pellet and FE-SEM images of (c)  $\text{Cu}_3\text{SbSe}_4$  nanoparticle disk pellet and (d)  $\text{Cu}_3\text{SbSe}_4$  nanosheet disk pellet. (e) the XRD patterns of  $\text{Cu}_3\text{SbSe}_4$  nanoparticle and  $\text{Cu}_3\text{SbSe}_4$  nanosheet after hot-pressing.

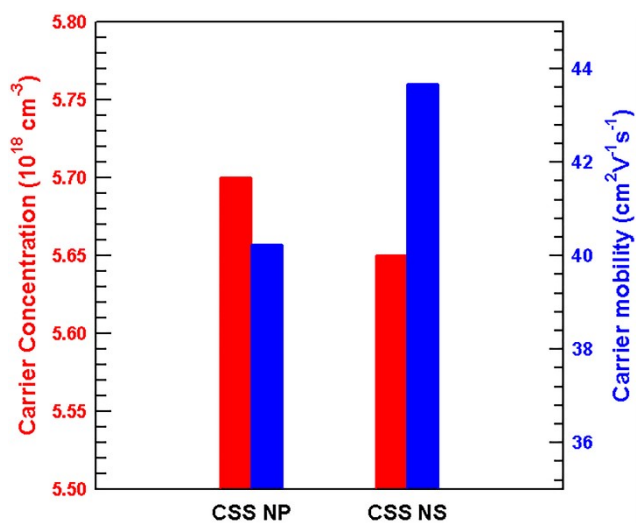

Fig. S3. Carrier concentration and carrier mobility of CSS NP and CSS NS at 298 K.
